# Supplementary material for: The Novel Oncolytic Compound LTX-401 Induces Antitumor Immune Responses in Experimental Hepatocellular Carcinoma
Source: PubMed Central journal article supplement — Mol Ther Oncolytics. 2019 May 21;14:139–48. doi: 10.1016/j.omto.2019.05.002 (PMC6562107; doi:10.1016/j.omto.2019.05.002), 2019-05-21
Supplement: mmc1.pdf [file mmc1.pdf]

**OMTO, Volume 14**

**Supplemental Information**

**The Novel Oncolytic Compound LTX-401  
Induces Antitumor Immune Responses  
in Experimental Hepatocellular Carcinoma**

**Brynjar Mauseth, Ketil André Camilio, Jihua Shi, Clara Louise Hammarström, Øystein Rekdal, Baldur Sveinbjörnsson, and Pål-Dag Line**

Supplemental information

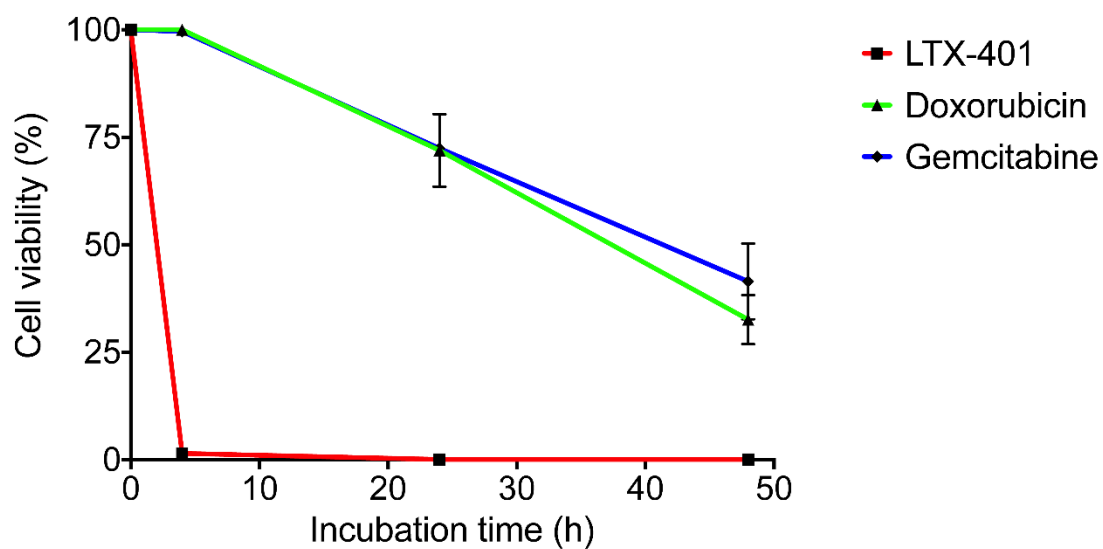

**Figure S1. Cytotoxic activity of LTX-401 compared to doxorubicin and gemcitabine.** JM1 cells were treated with the  $2 \times IC_{50}$  value for LTX-401, doxorubicin and gemcitabine for designated time points (4, 24 and 48 hours) and assessed for viability using the MTT assay. Data represent the mean  $\pm$  SD of three independent experiments with triplicates for each.
